# Supplementary material for: RnlB Antitoxin of the Escherichia coli RnlA-RnlB Toxin–Antitoxin Module Requires RNase HI for Inhibition of RnlA Toxin Activity
Source: MDPI journal article supplement (doi:10.3390/toxins9010029), 2017-01-11
Supplement: s1 [file s1]

**Figure S2.** Amount of FLAG-RnlA expressed from a plasmid. Wild-type (WT) or  $\Delta rnhA$  cells harboring pBAD33-Flag-*rnlA* were grown in LB medium until mid-log phase and then treated with (+) or without (–) 0.2% arabinose. Cell extracts were analyzed by western blot with the antibody against FLAG-tag (upper panel) and Coomassie Brilliant Blue staining as a loading control (lower panel). FLAG-RnlA is expressed in both wild-type and  $\Delta rnhA$  cells.

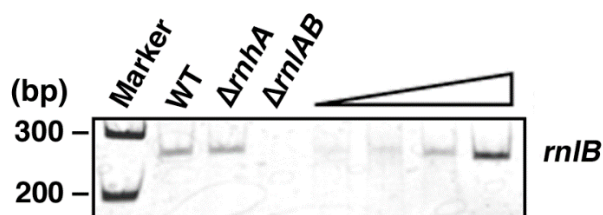

**Figure S3.** Amount of endogenous *rnlB* transcript. Wild-type (WT),  $\Delta rnhA$  or  $\Delta rnlAB$  cells were grown in LB medium until mid-log phase, and then total RNAs were extracted. RT-PCR analysis for the *rnlB* transcript was performed using the primers, KN-39 (5'-CGGGATCCATGTTTGAAATCACCGG) and KN-28 (5'-GTATCCAGCATGATCCGGCC), as described in [1]. Various amounts (10, 20, 40 and 80 pg) of pBSNO carrying the sequence from *rnlA* to *rnlB* were used as a template to demonstrate a semi-quantitative profile of PCR conditions. RNase HI has no effect on the expression of *rnlB* mRNA.

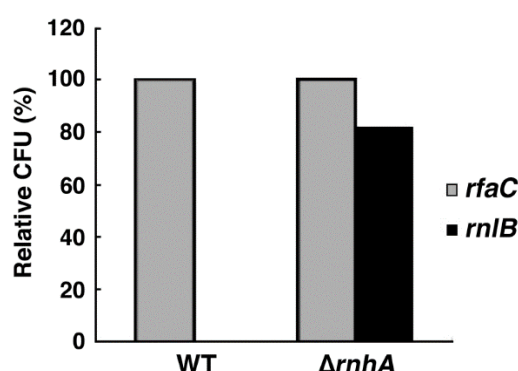

**Figure S4.** Effect of *rnhA* on the disruption of *rnlB*. Disruption of *rnlB* or a nonessential gene *rfaC* encoding ADP-heptose was performed as described [2]. Briefly, the DNA fragments containing a chloramphenicol acetyltransferase (CAT) cassette flanked with the sequences within *rnlB* or *rfaC* were amplified by PCR with pKD3 as the template using the primers; for *rnlB*, KN-35 (5'-GAGCGTGGGAATAATCAAGGACTTATATATTGTTTGAAATCACCGGAATGTGTAGGCTGGAGCTGCTTC) and KN-36 (5'-AAGTTAATATCATGCCCCAAAGGGCGAATTCTATACTGGTTCGTTTAGAAAAATGGGAATTAGCCATGGTCC); for *rfaC*, *rfaC*-Dup (TACTGGAAGAACTCAACGCGCTATTGTTACAAGAGGAAGCCTGACGGATG GTGTAGGCTGGAGCTGCTTC) and *rfaC*-Ddw (AAGTTTAAAGGATGTTAGCATGTTTTACCTTTAT AATGATGATAACTTTTATGGGAATTAGCCATGGTCC). Each 500 ng of the amplified fragment was introduced into TY0807 or TY0826 cells harboring pKD46, which encodes the  $\lambda$  phage Red recombinase, then cells were spread on LB plates supplemented with chloramphenicol and incubated at 30 °C for 20 h to count colony forming unit (cfu). The number of cfu for disruption of *rfaC* was set to 100% in each recipient. The disruption of *rnlB* in the genome of  $\Delta rnhA$  cells is successful.

## References

1. Otsuka, Y.; Miki, K.; Koga, M.; Katayama, N.; Morimoto, W.; Takahashi, Y.; Yonesaki, T. IscR regulates RNase LS activity by repressing *rnlA* transcription. *Genetics* **2010**, *185*, 823–830.
2. Datsenko, K.A.; Wanner, B.L. One-step inactivation of chromosomal genes in *Escherichia coli* K-12 using PCR products. *Proc. Natl. Acad. Sci. USA* **2000**, *97*, 6640–6645.
